# Supplementary material for: Exploring the mediating roles of physical literacy and mindfulness on psychological distress and life satisfaction among college students
Source: PeerJ. 2024 Jul 25;12:e17741. doi: 10.7717/peerj.17741 (PMC11283774; doi:10.7717/peerj.17741)
Supplement: Data S1 [file peerj-12-17741-s002.xls]

## Sheet: analysis
university	age	gender	ls1	ls2	ls3	ls4	ls5	ssct	kut	set	strt	anxt	dept	mf1	mf2	mf3	mf4	mf5
1	21	2	2	3	3	3	2	7	8	6	14	13	13	4	4	4	4	4
2	18	2	1	3	4	4	3	4	9	9	11	6	13	6	6	6	6	6
2	18	2	5	5	5	4	4	7	13	9	13	13	12	3	2	2	2	2
1	22	1	5	4	4	3	1	8	12	11	12	12	12	5	5	5	5	5
2	20	1	4	4	4	4	2	7	12	4	14	11	12	3	3	2	3	2
2	19	1	4	4	4	5	4	13	14	12	13	11	12	4	4	2	2	3
1	19	2	3	2	1	3	1	11	15	7	8	11	12	3	3	4	3	4
2	18	1	4	4	5	4	2	8	11	7	14	10	12	4	4	4	4	4
1	20	1	2	3	3	2	2	5	8	7	13	10	12	3	2	2	2	2
2	19	1	2	4	2	4	2	10	11	12	13	10	12	4	4	5	5	5
6	19	1	3	2	3	6	1	8	12	6	11	10	12	1	1	4	1	5
2	18	1	6	6	6	5	4	11	11	11	11	8	12	3	3	3	3	3
2	19	1	5	5	5	4	5	9	12	11	8	8	12	5	4	5	5	5
2	19	1	3	3	2	5	6	6	12	4	15	7	12	2	2	2	2	2
2	21	1	1	3	3	2	3	7	11	10	7	7	12	5	4	5	4	4
2	19	2	4	4	4	6	3	12	12	8	7	7	12	2	2	2	2	4
2	18	1	5	4	4	4	3	11	13	10	9	5	12	3	6	6	3	6
1	20	2	7	7	7	7	7	13	11	11	15	13	11	4	3	3	6	6
1	21	1	5	5	5	3	1	11	13	5	14	12	11	4	3	3	5	4
6	20	2	3	3	3	3	1	5	9	4	13	12	11	4	3	2	3	4
1	22	1	4	4	1	3	1	7	11	8	13	12	11	4	4	4	4	4
1	21	2	3	3	3	3	1	5	10	8	9	11	11	4	3	2	2	2
1	21	2	4	7	7	7	4	11	15	12	13	10	11	4	4	4	4	4
2	18	2	4	4	4	4	1	6	13	9	14	9	11	3	2	3	4	3
2	21	1	4	4	4	4	2	6	9	5	8	8	11	3	4	2	2	3
6	20	2	4	4	4	3	2	11	13	8	11	7	11	3	3	3	3	4
3	20	2	5	4	4	4	3	8	10	8	10	6	11	3	3	4	2	2
1	21	1	2	2	2	4	1	15	14	10	5	5	11	3	2	2	2	2
2	20	1	4	4	4	4	4	5	9	8	9	12	10	2	5	3	4	3
1	23	1	4	3	3	3	6	9	12	11	12	11	10	4	4	4	4	4
6	22	1	3	3	3	3	1	7	10	9	12	11	10	4	4	4	3	4
4	19	1	4	4	4	4	4	9	9	9	13	10	10	4	3	4	3	4
2	19	1	4	3	3	5	3	9	11	10	6	9	10	2	3	2	2	2
6	18	2	3	3	3	4	2	7	10	8	11	8	10	3	4	3	3	3
1	20	2	7	6	5	4	7	10	14	11	9	8	10	3	2	2	2	3
4	23	1	5	5	4	5	4	12	12	12	9	8	10	4	4	4	4	4
6	19	1	4	3	5	5	5	11	15	15	6	8	10	3	2	3	2	2
2	18	1	2	2	2	3	3	7	13	5	15	13	9	2	2	2	3	2
2	19	1	5	4	5	3	4	8	8	9	13	13	9	3	4	4	5	4
1	20	2	4	3	4	4	4	9	11	8	11	12	9	3	3	3	3	3
1	20	2	5	5	5	4	3	11	12	11	10	12	9	2	2	3	2	2
2	19	1	5	5	4	3	2	14	14	12	13	11	9	4	4	5	4	3
3	19	1	4	4	4	4	4	9	9	9	10	10	9	3	4	3	3	4
2	18	1	1	1	3	2	1	6	7	7	9	9	9	4	5	4	3	3
4	22	1	5	5	4	4	5	11	10	11	8	8	9	3	3	3	3	3
2	19	1	5	6	6	5	5	11	11	11	12	7	9	5	5	2	5	5
1	19	2	4	6	5	4	2	7	11	10	9	7	9	5	5	4	5	4
1	22	1	7	7	7	7	7	15	15	15	8	7	9	5	5	5	5	5
6	21	1	7	7	7	7	1	11	15	5	12	6	9	3	3	2	2	2
6	20	1	3	4	4	3	5	7	8	9	9	6	9	6	5	6	5	4
2	18	1	3	4	4	3	3	12	15	13	6	6	9	2	3	4	3	3
6	19	2	4	4	4	3	2	7	8	7	5	4	9	4	5	3	3	2
1	20	2	4	4	4	5	3	11	11	12	6	3	9	3	2	3	3	3
2	19	2	3	5	4	3	5	12	13	7	5	3	9	3	3	3	3	3
2	18	1	5	5	5	5	4	8	11	5	15	13	8	3	3	3	4	3
6	18	2	5	5	5	4	1	10	13	9	11	10	8	3	3	3	3	3
2	18	1	5	5	5	4	4	9	9	9	11	10	8	3	3	3	3	3
1	22	2	2	2	1	2	2	7	11	5	10	10	8	3	3	2	3	3
2	18	1	5	5	5	4	3	8	13	9	9	10	8	4	4	4	3	3
2	19	2	2	2	2	2	2	6	10	8	11	9	8	4	3	3	3	3
2	19	1	4	4	4	4	4	9	9	9	11	9	8	3	3	3	3	3
1	18	2	5	5	5	5	5	9	11	9	9	9	8	3	3	3	3	3
1	21	1	4	3	3	4	3	8	9	7	8	9	8	2	3	2	3	2
6	19	2	3	3	4	2	2	11	12	9	7	9	8	4	4	4	4	4
6	22	2	4	4	4	5	5	9	13	10	11	8	8	4	4	3	3	4
1	21	1	4	5	5	5	3	10	12	10	8	8	8	3	4	3	3	3
2	18	1	4	4	4	3	2	11	12	9	7	8	8	2	2	3	4	3
2	18	1	4	4	4	5	1	11	14	8	11	7	8	4	3	3	4	3
4	21	1	5	5	4	4	2	8	8	7	8	7	8	3	3	3	3	3
1	20	2	4	4	4	4	4	7	11	7	11	6	8	4	4	4	4	4
4	19	1	6	6	6	6	7	9	12	10	7	6	8	4	3	3	3	3
2	18	1	4	4	4	4	2	8	11	8	11	5	8	3	3	2	3	4
2	19	2	4	4	4	4	4	8	10	7	11	5	8	3	3	4	3	5
2	19	1	5	4	5	3	6	8	9	5	5	5	8	3	4	3	4	4
2	18	2	4	4	4	5	2	13	15	10	7	2	8	4	4	3	3	3
1	20	1	5	6	6	6	6	11	12	12	8	11	7	5	5	4	2	5
2	19	1	3	3	2	4	1	13	14	11	8	9	7	2	3	4	3	2
2	18	1	2	3	3	5	3	7	12	10	8	9	7	3	4	3	5	3
6	19	2	4	3	4	3	5	9	8	7	10	8	7	4	4	2	3	4
2	20	1	4	4	4	4	2	13	15	8	10	8	7	2	4	4	4	4
3	20	1	4	4	4	4	4	9	11	9	9	8	7	3	3	3	3	3
4	19	2	3	3	4	4	7	7	13	7	9	8	7	4	3	3	1	3
2	19	2	4	4	4	4	4	9	9	9	8	8	7	3	2	2	2	2
2	20	1	5	4	4	4	2	8	7	8	10	7	7	4	4	4	4	4
2	20	2	3	3	4	4	2	10	14	7	9	7	7	3	1	2	2	4
1	21	1	5	4	5	4	1	12	13	11	9	7	7	3	3	3	3	3
6	19	2	4	4	4	4	3	12	12	12	8	7	7	4	4	4	4	4
4	19	1	5	5	5	5	5	12	12	12	8	7	7	2	2	2	2	2
1	21	1	4	4	4	4	4	9	9	9	7	7	7	3	3	3	3	3
1	23	1	4	4	4	4	4	9	9	9	7	7	7	3	3	3	3	3
2	18	2	4	4	4	4	4	9	10	7	7	7	7	4	4	3	3	3
2	19	2	4	4	4	4	4	9	9	9	7	7	7	4	4	4	4	4
2	18	2	4	4	4	4	4	10	11	10	7	7	7	4	4	4	4	4
1	21	1	4	4	4	4	4	9	9	9	7	7	7	5	5	5	5	5
1	22	1	4	4	4	4	4	9	10	9	7	7	7	5	5	5	5	5
4	21	2	4	4	4	4	4	9	9	9	7	7	7	5	5	5	5	5
5	19	2	5	5	5	5	5	12	13	12	7	7	7	2	2	2	2	2
3	19	2	5	5	5	5	3	15	15	10	7	7	7	3	3	3	5	3
2	17	1	5	5	5	5	5	9	9	9	7	7	7	4	4	3	3	3
6	19	1	5	5	5	5	5	12	12	12	7	7	7	3	4	4	4	4
2	18	1	6	6	6	6	6	4	8	9	7	7	7	2	2	2	2	2
1	20	2	7	6	6	6	6	12	12	12	7	7	7	5	5	3	3	3
1	19	1	6	5	6	6	6	11	9	11	7	7	7	5	5	5	5	5
2	18	1	5	6	7	7	7	8	15	12	7	7	7	3	4	6	4	3
1	19	1	5	5	5	5	5	9	9	9	6	7	7	5	5	5	5	5
3	21	2	4	3	3	7	2	8	11	11	9	6	7	1	4	3	3	3
2	18	2	3	3	3	3	2	9	11	8	8	6	7	4	3	3	3	3
1	20	2	5	4	4	3	3	12	12	12	10	5	7	5	5	2	4	4
1	20	1	6	6	6	5	4	12	13	11	7	5	7	3	2	4	2	5
5	20	2	3	3	3	3	3	6	9	8	6	5	7	2	1	2	2	3
2	20	1	4	4	4	4	1	8	11	12	6	5	7	4	3	3	4	4
2	19	1	4	4	4	4	4	3	12	6	11	4	7	3	2	6	3	2
2	19	1	7	7	7	7	1	13	13	11	8	4	7	6	6	6	6	6
6	22	2	4	4	4	4	3	9	9	9	6	4	7	4	3	2	4	4
2	17	2	5	4	5	5	7	10	11	13	9	3	7	4	4	2	4	5
2	18	1	4	4	4	3	2	5	9	6	6	3	7	3	3	3	4	3
6	19	1	4	4	5	3	2	9	10	7	6	3	7	4	3	4	3	2
2	19	1	3	3	4	3	3	10	11	8	5	2	7	4	5	4	5	6
1	22	2	3	3	4	2	1	10	14	6	9	1	7	4	4	3	4	3
2	19	1	4	3	4	3	5	14	15	15	15	13	6	3	3	2	3	2
2	19	2	5	4	6	4	2	13	15	13	14	12	6	4	4	3	3	3
2	20	1	6	5	5	5	3	7	10	7	12	11	6	4	4	4	2	2
1	20	2	7	7	7	7	7	15	15	15	10	11	6	3	3	3	3	3
2	18	1	6	6	6	3	5	12	15	8	12	10	6	4	4	3	5	4
2	18	2	4	4	4	3	4	8	9	9	9	10	6	4	4	3	4	4
1	20	1	4	4	4	4	4	13	13	8	9	9	6	4	3	3	5	3
2	18	1	3	3	3	3	3	7	9	8	10	8	6	3	3	4	4	4
2	17	1	3	4	3	4	3	8	10	11	6	8	6	4	3	4	3	2
2	20	1	4	4	5	4	1	9	10	9	9	7	6	3	3	4	6	4
2	20	2	4	4	4	4	3	7	11	7	6	7	6	3	3	3	4	4
2	19	1	3	3	3	3	2	11	11	6	9	6	6	3	3	2	2	2
2	18	1	3	4	3	3	2	10	12	10	9	6	6	4	3	4	3	3
1	21	2	2	2	2	3	2	9	11	6	8	6	6	4	4	2	3	3
6	21	2	4	4	4	5	3	9	10	9	8	6	6	3	3	3	4	4
4	21	2	5	4	4	5	2	11	14	7	8	6	6	4	4	4	4	4
5	18	1	6	5	5	5	3	14	15	12	8	6	6	4	4	4	4	4
2	18	1	7	7	7	7	7	9	13	10	8	6	6	4	4	6	2	2
2	19	2	6	6	4	5	6	7	9	9	5	6	6	4	2	4	3	4
6	21	2	4	4	3	2	2	10	13	6	12	5	6	4	5	3	5	5
6	20	1	2	2	3	7	1	6	13	11	11	5	6	4	3	4	3	3
2	20	1	3	3	3	2	1	8	13	8	8	5	6	2	2	2	2	2
2	19	2	5	5	5	5	5	10	12	9	7	5	6	3	4	5	4	4
6	18	2	5	4	4	5	3	11	11	10	5	5	6	4	4	4	4	4
2	18	1	4	4	4	4	2	7	10	8	4	5	6	3	3	2	3	3
3	19	2	4	4	3	4	3	12	14	8	9	4	6	4	4	3	3	3
6	22	2	4	4	4	5	4	13	12	11	8	4	6	4	4	3	5	6
2	19	2	6	6	6	6	5	10	11	11	7	4	6	4	4	3	5	4
1	21	1	3	4	5	3	3	5	11	11	6	4	6	5	4	3	4	4
6	19	2	4	4	4	4	3	7	9	6	5	4	6	3	3	3	3	5
6	19	2	4	4	4	4	2	12	14	8	7	3	6	4	4	2	3	4
5	18	2	4	4	5	4	3	7	12	9	6	3	6	4	5	2	4	5
2	20	1	5	4	6	4	3	9	12	10	6	3	6	5	4	3	4	3
6	22	2	6	6	6	6	2	9	13	8	5	3	6	5	3	3	3	3
2	18	2	6	5	5	5	5	10	11	9	2	3	6	3	3	4	4	4
2	19	1	3	5	3	3	6	11	10	8	0	3	6	4	4	5	5	3
2	19	1	4	4	4	4	2	11	11	9	4	1	6	5	4	3	6	6
1	22	2	4	3	2	3	1	11	12	10	12	10	5	4	5	3	5	3
2	19	2	5	5	5	5	1	10	15	7	10	10	5	5	5	4	5	5
2	19	1	3	3	3	3	3	6	10	6	7	10	5	3	3	3	2	1
2	21	1	6	5	6	4	4	9	14	9	15	9	5	4	2	2	3	4
6	18	2	7	7	7	7	5	13	14	8	12	9	5	4	3	4	4	4
2	18	1	3	1	5	2	1	5	7	5	7	9	5	5	4	6	5	5
6	19	2	3	4	3	3	3	6	12	8	12	8	5	2	2	2	1	1
2	18	1	4	4	4	4	3	9	11	7	11	8	5	4	3	3	3	3
2	19	2	3	3	3	3	3	10	12	8	9	8	5	4	3	3	3	3
6	20	2	7	4	4	4	4	6	10	7	9	8	5	4	4	4	3	3
2	19	1	4	4	4	4	4	12	11	12	7	8	5	4	4	3	3	4
6	19	2	4	5	4	4	4	9	9	9	5	8	5	4	4	4	4	3
1	22	1	6	6	6	6	6	12	12	12	12	7	5	5	5	5	5	5
6	23	1	4	4	4	2	3	15	15	8	7	7	5	4	4	3	4	3
2	18	1	6	5	5	4	4	12	15	10	7	7	5	4	4	3	3	5
4	21	2	3	2	2	2	2	9	9	8	5	7	5	3	3	3	3	3
2	18	1	4	4	4	4	1	9	10	10	5	7	5	4	4	3	4	4
1	20	1	5	4	5	5	1	10	14	10	9	6	5	4	4	4	3	4
2	18	1	3	3	3	3	2	11	12	9	8	6	5	4	4	5	4	5
1	20	1	4	4	4	4	1	8	15	9	8	6	5	3	2	2	3	3
1	19	2	6	6	6	6	3	9	10	9	8	6	5	3	4	2	3	3
2	19	2	6	6	6	6	4	10	12	9	8	6	5	3	3	3	3	3
2	20	1	5	6	6	6	6	13	10	10	8	6	5	4	4	4	4	4
2	18	1	4	4	4	4	4	13	15	14	7	6	5	3	3	3	4	4
2	18	1	4	3	4	4	2	7	14	6	4	6	5	3	3	3	5	4
5	19	2	4	4	5	5	5	9	10	9	9	5	5	4	4	4	5	4
3	22	2	4	4	5	3	3	8	11	11	7	5	5	4	4	3	4	4
1	21	2	5	5	5	4	3	7	13	7	6	5	5	4	4	2	3	3
3	21	1	7	7	7	3	3	10	15	8	3	5	5	4	3	2	4	4
6	21	2	5	5	5	5	5	8	10	12	3	5	5	2	3	3	4	3
1	19	2	5	5	5	5	3	10	12	8	6	4	5	5	5	3	3	4
6	20	2	4	5	6	6	6	10	12	12	9	3	5	6	5	3	5	5
3	21	2	5	4	4	3	3	7	8	8	8	3	5	2	4	3	3	3
2	19	2	4	4	4	3	3	7	12	8	7	3	5	5	5	4	4	5
2	18	1	5	4	4	6	5	9	13	10	7	3	5	3	3	3	6	5
2	17	2	4	4	4	5	1	7	15	5	6	3	5	6	3	3	3	3
6	20	2	4	5	4	3	3	7	12	8	5	3	5	4	4	3	4	3
6	18	2	4	6	6	4	1	9	11	9	4	3	5	5	3	5	4	1
6	21	2	6	7	7	7	7	10	13	11	3	3	5	4	3	3	4	3
2	18	1	4	4	3	5	7	8	12	10	2	3	5	4	4	5	1	3
3	20	2	5	5	5	5	5	12	13	11	8	2	5	5	5	5	4	5
4	22	1	5	5	5	3	3	12	12	11	3	1	5	5	5	5	4	5
2	18	1	5	5	5	3	2	7	12	6	11	10	4	3	4	5	5	4
2	19	1	5	5	5	5	1	9	15	6	12	9	4	3	2	2	2	3
6	19	2	5	7	7	4	7	12	14	11	9	9	4	4	4	3	5	6
2	17	2	4	4	4	4	4	6	13	5	9	8	4	4	4	3	4	4
2	17	2	4	4	4	4	5	7	12	9	7	8	4	2	3	2	3	3
6	19	2	3	2	2	3	2	8	11	8	6	8	4	5	4	2	4	5
2	20	1	3	4	3	3	3	9	11	9	10	7	4	4	3	3	2	3
2	23	2	4	4	4	4	2	7	10	7	9	7	4	5	5	3	3	4
2	18	2	4	4	4	5	3	12	14	11	9	7	4	4	4	3	5	5
2	19	1	4	4	5	4	4	7	11	9	8	7	4	4	5	4	4	4
2	18	1	5	5	5	4	4	8	10	8	7	7	4	4	4	3	4	4
6	20	2	5	5	5	5	4	8	10	9	7	7	4	4	4	3	3	5
1	21	2	6	6	6	6	6	12	12	12	7	7	4	4	4	3	3	4
5	19	1	4	3	5	5	5	5	10	5	5	7	4	4	4	2	3	3
2	18	1	3	5	2	3	1	7	14	9	4	7	4	5	3	2	4	5
2	18	2	4	4	4	6	4	11	12	11	7	6	4	4	3	2	3	5
6	18	2	7	7	7	7	7	15	15	15	6	6	4	5	5	3	5	5
1	20	2	4	3	4	3	2	8	10	8	8	5	4	3	3	3	3	3
6	19	2	4	4	4	4	2	8	11	9	8	5	4	4	4	3	2	3
5	19	2	4	4	5	7	3	10	12	8	8	5	4	4	4	2	5	5
2	19	2	6	5	5	5	3	11	14	10	7	5	4	4	4	3	4	4
5	17	2	4	4	4	4	3	9	13	9	6	5	4	3	4	3	4	4
2	20	1	4	4	4	4	3	12	14	10	4	5	4	4	2	3	4	5
2	18	1	5	5	5	5	5	9	14	8	4	5	4	3	2	2	2	2
6	19	2	5	4	4	4	3	9	10	10	3	5	4	4	3	4	4	4
6	19	2	6	5	6	6	6	12	12	10	10	4	4	5	3	5	5	5
2	19	2	4	3	5	4	1	11	14	10	9	4	4	6	5	5	6	6
3	20	2	5	6	5	5	4	15	15	11	7	4	4	5	4	5	6	3
1	21	2	4	4	3	3	3	9	10	10	6	4	4	4	4	3	4	4
2	18	1	3	3	3	4	3	8	14	9	5	4	4	3	5	4	4	4
6	18	2	6	6	6	6	6	12	12	12	4	4	4	6	6	6	6	6
1	19	2	4	4	4	4	4	14	15	13	3	4	4	4	3	3	3	3
2	18	2	6	5	5	4	6	9	11	8	3	4	4	2	2	5	3	4
6	21	2	5	4	4	5	4	10	11	10	11	3	4	5	4	3	4	5
1	19	1	4	4	4	4	1	6	10	7	9	3	4	4	4	4	4	4
1	20	1	4	3	3	2	1	7	12	9	7	3	4	4	5	2	4	2
6	20	1	5	5	5	6	2	12	12	12	7	3	4	3	3	4	3	3
2	18	1	5	4	4	4	4	12	15	12	6	3	4	3	3	3	4	3
2	18	1	4	4	4	4	4	9	9	9	4	3	4	3	3	3	4	4
1	21	2	4	5	5	6	6	6	9	10	3	3	4	3	4	4	4	3
2	18	2	5	5	6	5	5	11	12	12	2	3	4	4	5	4	5	5
6	20	2	4	5	5	6	2	9	11	10	2	3	4	4	3	3	3	3
2	18	1	3	4	3	2	1	9	13	10	11	2	4	4	4	2	5	5
1	20	2	3	3	4	6	4	5	8	7	9	2	4	4	3	3	4	4
2	20	1	6	6	5	6	5	12	11	12	8	2	4	5	3	3	3	3
2	18	1	4	4	4	4	2	8	12	12	5	2	4	5	5	3	5	5
2	19	1	5	5	4	6	2	12	14	12	4	2	4	3	4	2	4	3
2	18	2	5	5	5	6	3	7	12	6	4	2	4	4	3	3	3	3
1	21	1	6	5	5	4	3	9	13	13	2	2	4	5	4	4	5	5
2	18	1	4	4	4	3	1	12	12	11	1	2	4	5	4	3	4	4
2	20	1	7	7	7	6	6	15	15	15	6	1	4	6	6	3	5	6
2	18	1	5	5	4	4	2	15	15	15	5	1	4	5	5	3	5	5
1	20	2	4	4	4	4	1	8	15	12	8	10	3	3	3	3	3	3
2	18	2	5	5	5	4	4	9	10	11	3	9	3	4	4	5	5	4
2	18	1	3	3	3	3	5	6	10	6	9	8	3	4	4	4	4	5
1	20	2	5	4	5	4	1	11	12	8	8	8	3	3	4	3	3	3
2	18	1	5	5	5	3	1	10	13	10	6	8	3	4	3	4	4	4
1	21	2	5	6	5	6	4	9	12	11	5	8	3	4	4	2	4	3
6	20	2	4	4	4	5	4	11	11	12	4	8	3	5	5	5	4	4
6	18	2	3	3	4	3	2	10	13	10	7	7	3	5	4	3	5	4
2	19	1	5	5	6	5	5	12	12	12	6	7	3	3	3	3	3	5
2	19	2	5	4	5	6	1	7	11	10	6	7	3	3	3	3	5	6
2	18	1	4	4	4	7	1	10	13	7	11	6	3	3	4	4	3	3
2	18	1	6	5	6	3	1	9	15	9	8	6	3	1	5	5	5	6
2	20	1	5	6	5	5	3	9	13	11	8	6	3	3	4	4	3	3
6	20	2	6	6	6	4	4	11	12	12	7	6	3	4	4	4	4	4
6	20	2	6	6	6	7	7	8	11	11	7	6	3	5	6	5	6	5
2	18	2	6	6	6	3	6	6	11	9	6	6	3	3	3	3	3	3
1	20	1	7	7	7	7	5	7	11	10	6	6	3	1	5	5	3	4
5	19	1	4	3	3	3	3	9	12	9	5	6	3	3	3	3	4	3
5	19	2	4	5	5	5	3	9	13	8	5	6	3	2	2	2	2	2
5	20	2	6	5	5	5	2	10	11	9	4	6	3	5	4	4	5	4
6	20	2	6	6	5	4	3	10	13	8	3	6	3	6	5	3	3	3
6	19	2	4	3	3	3	2	13	15	13	8	5	3	3	3	2	3	3
2	19	1	5	4	4	4	3	9	10	7	7	5	3	2	4	5	5	4
5	19	2	6	6	6	6	5	8	14	10	7	5	3	4	4	4	4	4
6	20	1	5	5	4	4	6	12	12	12	5	5	3	4	5	6	4	3
6	20	1	5	4	6	6	3	7	13	8	11	4	3	4	3	2	2	2
2	18	1	6	5	5	3	2	12	12	12	9	4	3	2	2	3	3	3
2	18	1	3	3	4	2	7	9	13	10	8	4	3	6	6	2	3	3
2	18	2	3	3	3	3	1	9	14	7	8	4	3	4	3	3	5	3
2	18	1	6	6	7	6	4	12	14	12	8	4	3	5	4	3	5	3
2	18	2	4	5	5	3	3	6	13	8	7	4	3	5	3	3	3	4
6	18	2	7	7	7	4	5	12	11	8	7	4	3	5	5	5	5	5
2	19	1	7	7	5	4	4	6	13	5	6	4	3	4	4	3	3	3
6	20	2	4	4	4	4	3	8	11	6	6	4	3	5	4	5	5	4
2	20	1	4	4	5	6	7	12	10	10	6	4	3	3	3	2	2	2
2	18	1	5	4	3	5	6	11	12	9	4	4	3	3	4	2	3	4
1	21	1	4	4	4	4	4	9	11	7	3	4	3	3	3	3	4	4
6	17	2	5	7	5	5	4	15	15	10	9	3	3	4	3	3	5	4
2	21	1	3	3	3	2	1	11	15	10	7	3	3	5	4	3	3	3
2	18	2	5	5	4	3	3	7	10	7	7	3	3	3	3	5	3	2
2	18	1	4	4	4	4	4	9	11	9	6	3	3	3	3	3	3	3
6	19	2	4	3	4	4	3	10	10	12	6	3	3	3	4	3	3	3
2	17	1	5	4	4	5	3	12	12	12	6	3	3	3	3	3	6	4
2	19	2	5	5	5	6	2	8	13	10	6	3	3	5	5	2	3	4
6	18	2	5	6	6	7	6	12	15	12	6	3	3	4	4	2	4	4
2	18	2	4	4	4	3	3	9	10	9	5	3	3	3	3	3	4	5
1	18	2	5	5	5	5	5	12	12	13	5	3	3	5	5	5	5	5
1	21	2	4	5	4	5	3	15	15	12	4	3	3	5	4	4	4	5
1	19	1	5	4	4	4	3	9	11	10	3	3	3	5	3	3	5	4
2	19	1	4	4	4	4	4	9	9	9	3	3	3	4	4	4	5	4
6	21	2	4	4	4	4	4	8	13	8	1	3	3	2	2	2	4	3
2	19	1	7	7	7	7	7	10	13	10	1	3	3	6	5	4	5	4
6	19	2	4	4	4	4	4	9	9	9	6	2	3	4	3	4	4	4
6	22	1	5	5	5	5	3	9	10	9	6	2	3	4	4	3	4	4
2	19	2	5	4	5	4	4	11	12	10	5	2	3	4	4	3	3	3
5	19	1	4	4	4	4	4	10	12	9	5	2	3	5	5	4	3	5
2	18	1	7	5	5	5	2	9	13	10	5	2	3	4	5	5	6	4
6	20	1	4	4	3	3	3	11	11	8	4	2	3	5	4	4	3	3
1	23	1	5	5	5	5	5	9	11	6	4	2	3	4	4	5	4	4
2	18	1	3	3	4	3	1	6	11	7	3	2	3	5	5	4	4	4
5	18	2	4	4	4	6	3	9	11	9	3	2	3	1	1	3	3	3
6	20	2	5	5	6	5	2	7	10	8	1	2	3	4	4	2	5	5
2	18	2	5	6	4	6	2	13	15	11	1	2	3	4	3	3	5	4
1	18	2	4	5	5	5	2	10	13	9	5	1	3	4	3	3	3	3
2	18	1	1	6	6	4	7	10	15	13	3	1	3	6	5	4	4	3
4	21	1	7	7	7	7	7	15	14	14	3	1	3	6	6	6	6	6
5	17	2	4	5	4	4	3	11	14	9	2	1	3	5	5	3	6	4
2	18	1	5	5	5	5	3	11	12	10	2	1	3	6	5	5	5	5
1	20	2	6	6	6	6	6	12	12	12	2	1	3	2	3	2	4	3
6	22	1	6	5	5	5	5	10	13	10	1	1	3	5	5	4	5	5
2	18	2	4	4	4	4	7	11	14	7	0	1	3	4	4	4	4	5
2	19	1	2	5	4	5	2	13	15	12	9	8	2	5	5	4	5	5
5	18	2	6	4	6	6	3	12	15	10	5	8	2	3	3	5	3	5
2	18	2	4	4	6	5	5	9	11	6	7	7	2	4	3	2	4	4
2	18	1	5	5	5	4	4	11	12	9	11	6	2	3	2	3	4	4
4	21	2	5	4	4	4	1	10	13	11	7	6	2	5	6	4	5	5
2	18	1	6	4	3	5	1	8	13	6	7	6	2	3	3	3	3	6
2	18	2	5	4	5	6	5	12	15	9	5	6	2	5	4	4	5	5
5	18	1	4	4	4	4	2	11	12	9	4	6	2	5	5	3	5	5
5	18	2	5	6	6	6	6	9	12	10	4	6	2	6	6	3	4	5
6	19	2	5	5	5	5	5	9	11	11	8	5	2	5	3	3	4	4
6	19	1	5	5	5	5	3	10	12	9	8	5	2	4	5	3	3	3
6	20	2	5	5	5	5	5	12	12	11	8	5	2	5	5	4	4	5
2	18	1	6	5	7	5	5	8	13	9	7	5	2	3	3	2	2	5
2	20	2	4	5	4	5	1	9	10	11	6	5	2	2	4	2	6	3
6	18	2	4	7	7	4	4	9	14	12	5	5	2	4	4	4	4	4
1	20	1	3	5	5	2	1	12	13	8	4	5	2	3	2	3	3	3
1	21	2	4	3	3	3	3	9	8	8	4	5	2	4	4	4	5	4
2	19	1	6	5	6	5	4	7	13	11	4	5	2	5	4	2	6	5
6	20	2	5	5	5	5	5	11	10	10	4	5	2	5	5	6	4	4
1	20	1	4	4	4	4	3	12	15	10	9	4	2	5	5	6	5	5
2	19	1	6	5	6	4	1	10	14	14	8	4	2	5	5	2	4	2
1	21	2	3	3	3	3	2	7	13	8	7	4	2	4	5	5	5	5
2	18	2	5	5	5	5	4	11	12	11	7	4	2	4	4	3	5	4
6	18	2	4	4	3	2	5	10	13	10	6	4	2	4	4	5	5	4
2	17	2	3	4	4	3	2	15	15	12	6	4	2	5	5	5	5	5
2	18	2	5	5	5	4	3	8	12	9	6	4	2	4	4	3	5	4
6	20	2	4	4	4	4	4	9	12	6	6	4	2	5	2	4	4	5
1	19	1	7	7	7	7	7	15	15	15	6	4	2	6	6	6	6	6
5	19	2	4	4	4	4	4	10	15	11	5	4	2	3	3	3	3	5
1	19	2	4	4	4	5	5	6	11	8	5	4	2	4	4	3	4	4
5	19	1	4	4	4	2	2	11	15	12	4	4	2	3	4	3	5	5
2	19	2	6	5	5	5	5	10	15	10	4	4	2	4	5	2	5	4
6	18	1	6	7	7	7	5	15	15	14	2	4	2	4	3	3	3	6
2	18	2	3	5	5	3	7	12	15	9	8	3	2	3	3	6	6	4
2	18	2	5	5	6	5	2	6	9	10	8	3	2	5	3	2	5	5
2	18	1	4	4	2	2	2	13	14	11	6	3	2	4	3	4	5	4
6	20	2	5	4	5	4	3	6	10	11	6	3	2	3	3	3	2	2
1	23	2	4	4	4	4	4	7	10	8	6	3	2	5	5	5	5	5
2	20	1	4	4	5	5	3	11	12	9	6	3	2	4	3	3	3	4
6	20	2	4	2	4	3	2	10	12	9	5	3	2	5	4	4	3	3
1	21	2	4	4	4	5	3	10	13	9	5	3	2	3	3	5	4	4
2	18	1	6	6	6	6	4	11	12	12	5	3	2	2	3	2	3	5
2	18	1	5	5	5	6	5	10	15	11	5	3	2	3	4	4	4	5
1	22	1	5	5	5	3	3	14	15	10	4	3	2	5	5	5	4	5
1	21	2	7	7	7	5	5	5	12	7	4	3	2	5	4	3	5	6
2	18	2	4	4	2	2	1	8	13	9	3	3	2	4	4	4	4	4
1	21	2	6	5	5	4	3	12	12	12	3	3	2	4	4	3	5	5
3	19	2	4	5	5	4	3	11	12	12	3	3	2	3	3	5	3	3
1	20	2	4	4	4	5	4	7	11	8	3	3	2	4	4	4	3	3
2	19	1	5	7	6	5	1	10	13	11	3	3	2	6	5	5	4	4
3	19	2	4	5	5	3	2	11	13	12	2	3	2	4	4	3	5	5
5	19	2	5	5	6	5	3	10	15	9	1	3	2	5	5	2	5	4
2	19	1	7	7	7	7	7	11	13	12	1	3	2	5	5	4	6	3
2	18	1	7	7	7	4	7	9	15	9	7	2	2	4	4	4	4	5
2	19	1	5	5	5	5	3	11	13	10	7	2	2	5	5	4	5	5
1	20	2	4	4	4	5	3	9	11	8	6	2	2	3	4	3	4	4
2	17	2	5	5	6	6	5	10	12	9	6	2	2	4	5	3	5	4
5	18	2	5	5	5	7	7	9	14	6	5	2	2	6	5	6	4	6
2	19	2	5	5	5	5	3	10	10	9	4	2	2	4	4	3	4	4
1	19	2	5	5	5	5	3	11	14	10	4	2	2	5	4	4	5	5
2	19	1	4	4	5	6	3	7	11	9	4	2	2	4	3	4	4	5
6	21	2	6	6	6	6	6	7	11	8	4	2	2	6	5	5	5	4
5	20	2	5	7	7	4	7	14	15	12	3	2	2	6	5	4	4	6
1	21	2	5	5	5	5	5	11	12	12	3	2	2	4	4	4	4	4
2	18	1	5	4	4	6	3	14	15	11	2	2	2	6	6	5	6	6
2	19	1	6	5	6	5	4	13	15	14	1	2	2	5	5	5	6	6
2	20	1	6	6	6	4	2	7	12	12	2	1	2	3	3	2	2	2
5	19	2	4	5	5	4	3	7	10	7	2	1	2	4	5	5	5	4
2	18	1	4	4	5	7	4	14	15	12	2	1	2	4	2	2	6	5
2	18	1	7	7	7	7	7	9	11	9	2	1	2	5	4	4	4	4
6	20	2	5	5	5	6	4	12	12	9	1	1	2	5	5	4	5	5
2	18	1	5	5	6	5	3	10	13	12	6	0	2	5	4	3	5	6
6	21	2	4	4	4	4	4	9	9	9	3	0	2	6	6	6	6	6
6	18	2	5	5	5	5	5	14	15	15	0	0	2	6	6	6	6	6
2	19	1	6	5	6	4	4	11	12	13	5	9	1	5	5	3	5	6
2	18	1	4	5	3	2	1	8	9	10	2	9	1	3	3	2	4	5
2	20	1	5	7	7	5	1	12	13	12	6	7	1	4	4	3	5	5
6	20	2	4	3	4	5	4	4	10	8	10	6	1	4	3	6	5	6
2	18	2	5	4	5	3	2	11	14	9	7	6	1	4	3	3	5	4
3	18	2	4	3	3	4	1	9	9	9	7	6	1	4	4	3	4	3
6	19	2	5	4	3	3	3	11	11	9	6	6	1	5	4	5	3	2
2	18	1	4	5	5	4	3	11	12	9	5	6	1	5	5	4	4	5
2	18	1	7	6	6	4	4	10	15	12	7	5	1	6	5	2	4	5
2	18	1	6	6	6	7	6	14	14	11	7	5	1	4	4	5	4	5
4	22	1	6	5	5	5	4	12	12	12	6	5	1	2	5	4	4	4
6	18	2	5	5	5	5	5	12	12	12	5	5	1	6	6	5	5	6
2	18	1	4	3	3	3	2	8	14	10	4	5	1	5	5	3	4	4
2	18	2	5	4	5	4	4	9	14	11	4	5	1	5	5	3	5	5
2	20	1	5	5	5	7	5	9	14	13	11	4	1	3	3	4	4	5
2	19	1	5	4	4	3	4	10	13	9	6	4	1	4	4	6	3	4
2	19	1	4	1	4	4	4	11	12	10	5	4	1	5	3	3	5	4
1	19	1	7	7	7	7	7	15	15	15	5	4	1	5	5	3	5	6
6	21	2	4	4	4	4	4	9	13	9	4	4	1	4	4	3	3	4
2	19	1	5	6	6	5	3	10	12	12	4	4	1	6	6	6	6	5
1	21	2	5	6	6	6	3	11	11	10	4	4	1	5	5	4	6	6
2	17	1	5	5	5	4	3	12	14	12	3	4	1	6	6	3	6	5
2	18	1	5	5	5	4	1	8	10	9	3	4	1	5	6	3	4	5
2	18	2	4	4	4	4	5	9	10	10	3	4	1	6	5	5	4	4
6	21	2	5	6	6	6	5	7	12	6	3	4	1	5	5	3	3	3
5	18	1	6	6	6	6	3	10	12	11	2	4	1	6	4	4	2	2
4	21	2	5	5	5	5	3	8	10	11	1	4	1	6	6	4	5	5
6	21	1	5	4	4	3	1	11	13	8	8	3	1	6	4	4	4	4
2	21	1	5	6	6	5	5	10	15	10	8	3	1	4	4	4	5	4
1	21	2	4	4	5	5	1	10	14	9	7	3	1	4	5	6	3	5
6	20	2	6	5	6	5	4	11	13	11	6	3	1	5	5	4	6	6
4	21	1	6	5	5	4	3	7	13	11	5	3	1	6	6	4	5	5
3	20	2	5	4	4	6	5	10	11	9	5	3	1	4	4	4	4	5
5	18	2	5	6	5	7	5	11	15	11	5	3	1	5	5	3	3	4
4	21	1	4	4	3	3	3	10	14	9	4	3	1	3	3	3	4	4
2	18	1	3	4	4	3	3	9	12	12	4	3	1	5	4	3	4	4
2	18	2	4	4	5	4	2	4	11	7	4	3	1	1	4	4	6	6
2	18	1	6	6	4	4	7	11	12	13	4	3	1	5	5	5	5	5
2	19	2	5	5	5	6	5	12	14	9	4	3	1	4	4	4	5	6
2	20	1	6	6	6	7	3	11	15	15	3	3	1	4	4	4	4	5
6	20	2	6	5	6	5	5	10	12	11	2	3	1	5	5	4	5	5
2	18	2	6	5	6	5	4	13	13	11	2	3	1	6	5	6	5	6
2	20	1	4	5	5	4	7	12	12	12	1	3	1	3	3	2	6	5
4	20	2	6	5	5	5	5	12	12	12	1	3	1	2	1	3	1	2
6	20	2	7	7	7	7	7	15	15	15	1	3	1	5	5	5	5	5
2	18	2	6	6	6	6	6	12	13	10	0	3	1	6	4	3	5	6
2	18	2	6	6	6	6	6	11	11	12	0	3	1	4	4	4	4	5
2	18	2	3	3	3	4	4	11	12	8	8	2	1	4	3	3	4	4
5	19	2	6	6	6	6	6	11	15	12	8	2	1	5	4	3	3	5
2	17	1	7	4	5	2	4	9	12	8	7	2	1	4	4	3	5	5
2	18	1	6	6	6	3	3	15	15	13	5	2	1	4	3	3	5	6
2	18	2	6	6	6	5	2	13	15	13	5	2	1	5	4	4	5	5
2	18	1	5	4	4	7	2	10	11	8	5	2	1	5	4	3	4	5
1	20	1	4	3	2	3	1	9	14	8	4	2	1	3	2	3	4	3
2	18	2	5	5	5	4	4	9	10	11	4	2	1	4	3	3	4	4
6	20	1	6	5	5	5	5	11	12	11	4	2	1	4	4	4	4	4
2	20	1	4	5	3	6	4	14	15	12	4	2	1	6	5	5	5	5
2	18	2	5	5	4	7	3	11	12	9	4	2	1	4	4	2	3	5
6	18	2	5	4	5	3	2	11	15	13	3	2	1	4	5	3	3	4
2	18	1	7	7	7	3	7	15	15	15	3	2	1	4	4	3	4	4
2	18	2	3	4	4	3	1	11	15	9	3	2	1	3	3	3	5	5
5	19	2	3	3	4	4	2	8	12	8	3	2	1	4	4	3	3	4
2	19	1	5	5	6	4	5	8	11	10	3	2	1	4	4	4	5	5
5	18	2	4	4	4	4	4	9	13	11	3	2	1	5	5	5	5	4
1	20	2	5	5	5	5	4	9	11	8	3	2	1	5	4	4	3	3
2	18	1	5	5	5	6	2	9	12	6	3	2	1	4	4	4	4	5
2	18	1	5	5	5	4	1	8	10	11	2	2	1	4	4	4	4	4
2	18	2	3	4	4	4	3	10	12	10	2	2	1	4	4	4	5	4
2	18	1	6	6	6	5	6	12	15	11	2	2	1	4	5	3	4	4
1	20	1	6	5	5	5	5	12	13	12	2	2	1	6	6	5	5	5
5	20	2	5	5	5	5	4	9	11	9	2	2	1	5	5	5	5	5
2	18	2	6	6	6	6	6	4	9	10	2	2	1	5	5	3	4	4
6	19	1	6	6	6	6	6	11	13	10	2	2	1	6	6	4	6	6
4	21	1	7	7	7	7	7	15	15	14	2	2	1	5	5	5	5	6
1	21	2	4	5	5	4	4	15	15	10	1	2	1	5	5	5	5	5
2	18	1	6	5	5	5	5	9	15	12	1	2	1	4	4	3	5	5
2	18	2	5	5	6	5	4	12	15	11	1	2	1	5	5	4	5	6
2	18	1	5	5	5	4	4	12	12	12	0	2	1	6	5	5	6	6
2	19	2	5	5	5	5	5	12	12	12	5	1	1	4	4	4	5	5
2	20	1	7	7	7	7	6	15	15	12	5	1	1	5	5	5	5	4
6	18	2	5	6	6	7	7	10	14	10	4	1	1	5	4	4	5	5
1	21	1	4	6	6	7	5	15	15	13	4	1	1	6	4	6	6	4
5	19	2	3	3	3	3	2	9	11	8	3	1	1	5	6	4	5	6
1	21	2	4	6	5	4	4	13	13	12	3	1	1	4	3	4	5	6
6	19	2	5	5	5	5	3	11	12	12	3	1	1	6	6	5	5	4
6	18	2	6	6	7	6	4	15	15	12	3	1	1	1	6	5	6	6
6	21	2	3	3	3	2	2	8	10	9	2	1	1	5	5	3	4	4
1	21	1	5	5	5	4	5	9	10	9	2	1	1	4	5	5	5	4
4	19	1	5	5	6	6	6	12	13	13	2	1	1	5	3	3	5	5
3	19	2	6	6	6	6	6	11	11	12	2	1	1	4	5	5	3	5
2	18	2	4	4	4	2	2	10	12	8	1	1	1	4	4	4	4	5
6	20	2	5	5	5	4	2	6	10	5	1	1	1	4	3	3	3	5
2	17	2	5	5	4	5	4	9	12	10	1	1	1	4	4	3	4	6
1	19	1	6	6	6	5	6	11	13	10	1	1	1	4	4	3	4	4
2	19	1	6	5	7	7	7	15	15	15	1	1	1	6	6	6	6	6
2	18	1	3	5	3	3	6	13	15	10	0	1	1	5	5	3	6	6
2	18	1	5	5	3	3	4	7	14	10	0	1	1	5	5	5	5	5
4	19	1	4	4	4	4	4	9	11	11	0	1	1	6	6	4	6	6
2	20	1	6	6	6	6	6	12	12	12	0	1	1	5	5	4	5	4
6	18	2	5	6	5	6	5	12	11	10	0	1	1	6	6	4	4	6
3	20	2	7	7	7	7	7	15	15	10	0	1	1	6	5	5	6	6
2	18	1	5	5	5	2	1	11	13	10	2	0	1	4	4	3	5	3
2	20	1	6	6	6	7	4	14	15	13	2	0	1	6	3	6	5	6
6	18	1	5	5	6	5	3	12	10	11	1	0	1	5	4	3	5	5
1	20	2	6	6	6	5	5	5	8	8	0	0	1	5	5	5	4	4
2	18	1	5	5	5	5	5	9	11	7	0	0	1	6	6	6	6	6
2	21	2	6	6	6	4	3	13	15	12	4	6	0	4	4	3	5	5
2	18	1	4	5	5	2	1	11	14	11	8	5	0	4	4	4	2	2
2	18	1	2	4	4	2	1	10	15	10	6	5	0	5	3	3	4	4
2	17	1	5	5	5	3	2	11	13	9	5	5	0	5	4	4	3	5
6	18	2	7	6	7	5	5	12	15	9	2	5	0	4	3	2	2	3
6	20	1	5	4	7	5	7	12	15	13	2	5	0	6	6	3	6	5
6	18	2	5	5	5	5	5	11	15	10	2	5	0	4	4	4	5	5
6	20	2	4	4	4	3	1	9	9	9	7	4	0	4	3	4	3	3
5	19	2	5	6	5	5	6	6	11	8	6	4	0	6	6	2	5	6
1	19	2	5	4	4	4	3	10	13	10	5	4	0	5	5	4	4	4
4	22	1	4	5	5	4	2	10	13	10	4	4	0	4	5	4	4	4
6	21	2	5	5	6	5	3	12	14	11	4	4	0	6	6	5	6	5
2	18	1	5	5	6	7	4	15	15	14	4	4	0	6	5	3	5	5
1	20	2	4	4	4	4	4	6	11	12	3	4	0	3	3	6	3	3
6	18	2	5	4	4	5	1	9	9	8	3	4	0	6	4	6	6	6
2	18	1	5	6	6	6	7	13	14	11	3	4	0	5	5	4	4	6
2	19	1	5	6	6	6	6	6	11	9	2	4	0	5	5	3	3	3
2	18	2	5	5	5	6	3	13	13	11	2	4	0	4	4	4	5	5
5	18	2	5	5	5	5	3	11	11	11	0	4	0	4	5	3	5	5
6	19	2	7	7	7	6	7	11	15	11	0	4	0	6	5	4	6	6
6	20	1	6	6	6	6	2	13	15	13	8	3	0	1	3	3	4	3
2	19	1	5	4	5	3	3	5	10	7	6	3	0	6	4	4	4	4
1	21	1	4	4	4	5	6	13	13	14	4	3	0	1	2	4	1	5
2	17	2	4	4	4	3	3	9	11	7	3	3	0	5	3	3	4	3
6	21	2	7	7	7	7	7	15	15	15	3	3	0	6	6	2	2	2
5	18	2	4	4	6	7	3	8	14	11	3	3	0	5	5	4	6	5
2	18	2	5	4	4	5	3	11	13	9	2	3	0	6	6	4	6	6
2	18	1	5	6	6	6	6	12	13	13	2	3	0	4	4	2	5	5
5	19	2	5	4	5	6	3	8	10	10	2	3	0	1	2	3	6	6
2	19	2	5	4	4	3	2	7	14	7	1	3	0	3	3	3	6	6
6	19	2	3	3	4	3	2	9	15	11	1	3	0	3	5	4	6	6
2	18	1	5	5	5	4	6	9	13	12	1	3	0	5	5	4	3	6
2	18	2	6	6	6	4	2	8	11	7	0	3	0	4	2	2	6	4
2	18	1	5	4	5	6	6	12	11	11	0	3	0	6	5	5	5	5
2	18	2	7	7	7	7	7	15	15	15	0	3	0	6	6	6	6	6
2	18	1	4	4	4	3	2	7	13	10	5	2	0	5	5	3	6	5
5	19	2	6	6	6	5	1	10	14	11	5	2	0	5	5	4	5	5
4	20	1	6	6	6	6	6	7	11	8	5	2	0	5	5	4	4	5
6	22	2	4	3	3	2	4	8	11	8	4	2	0	4	5	6	3	3
1	22	1	4	4	4	4	4	9	9	9	4	2	0	4	4	4	4	4
2	18	1	5	5	5	5	5	10	14	12	4	2	0	5	4	4	6	6
2	18	1	5	5	5	5	4	13	15	12	4	2	0	5	5	5	4	5
2	18	1	4	4	4	4	1	10	14	12	3	2	0	5	5	4	5	4
2	18	1	4	4	4	4	3	9	14	9	3	2	0	6	4	4	5	5
2	17	1	4	5	5	5	5	9	13	10	3	2	0	4	4	4	5	5
1	20	1	5	5	5	5	4	7	11	8	3	2	0	6	5	5	5	6
5	18	2	4	6	6	6	3	7	12	8	3	2	0	5	3	3	6	5
5	20	2	3	3	3	3	3	6	9	6	2	2	0	5	5	5	5	5
1	20	2	4	4	4	4	3	11	13	7	2	2	0	5	5	3	3	3
6	19	1	4	4	4	4	4	9	9	9	2	2	0	2	4	4	4	3
2	19	1	5	5	5	5	6	8	13	9	2	2	0	5	5	4	4	4
5	20	2	4	4	5	5	1	8	11	12	2	2	0	4	4	5	5	5
2	17	1	5	5	5	6	5	9	14	10	2	2	0	5	5	3	5	4
2	19	1	7	7	7	7	6	15	15	13	2	2	0	6	6	3	6	6
2	20	1	6	6	6	4	3	10	11	11	1	2	0	5	5	2	5	3
2	18	2	7	7	7	4	7	12	15	13	1	2	0	6	4	4	6	5
1	18	1	5	5	5	4	4	12	13	7	1	2	0	4	4	5	3	4
6	18	2	5	5	5	4	5	9	13	9	1	2	0	5	5	6	6	6
2	17	2	7	7	7	6	5	9	14	9	1	2	0	4	6	5	1	3
4	22	2	6	7	6	6	2	7	12	11	1	2	0	5	5	5	6	5
6	21	2	4	7	4	3	1	10	14	12	0	2	0	4	4	4	6	6
2	17	2	4	4	3	3	5	9	12	10	0	2	0	6	6	5	6	5
1	23	1	5	6	5	5	5	12	12	12	0	2	0	5	5	5	5	5
2	18	1	5	6	6	5	5	13	15	9	0	2	0	5	5	5	6	5
1	21	1	6	6	6	5	4	10	13	10	0	2	0	6	5	6	5	6
2	19	1	7	6	6	7	5	11	15	14	0	2	0	6	6	5	5	5
2	18	1	4	4	5	7	4	6	10	11	0	2	0	6	3	5	5	5
5	19	2	7	4	5	7	4	14	15	12	0	2	0	5	5	6	6	6
6	20	2	4	4	4	3	2	9	10	10	5	1	0	5	4	4	6	4
2	17	1	6	6	6	7	6	11	15	10	5	1	0	6	4	5	5	5
2	19	2	6	7	7	5	5	11	14	10	4	1	0	6	6	5	5	6
6	20	2	4	5	5	5	2	12	14	13	4	1	0	6	5	6	4	4
2	19	1	7	6	6	4	6	12	15	12	3	1	0	6	5	2	5	5
2	18	1	4	5	5	5	2	9	11	8	3	1	0	4	6	3	6	6
1	21	1	6	6	6	6	5	12	15	13	3	1	0	4	5	4	5	5
5	18	2	5	5	5	4	4	11	12	10	2	1	0	5	5	3	5	5
5	19	2	7	6	6	5	7	12	15	10	2	1	0	3	2	2	2	2
2	19	1	5	5	6	5	4	8	11	10	2	1	0	6	5	5	4	4
6	17	2	5	5	5	5	5	11	12	12	2	1	0	5	5	5	5	6
2	17	1	7	7	7	7	7	11	14	9	2	1	0	6	6	6	6	6
2	19	2	4	5	5	3	3	12	15	10	1	1	0	4	5	6	6	6
2	20	1	6	5	4	4	1	14	15	11	1	1	0	5	5	4	6	4
5	19	2	7	7	7	4	5	12	15	11	1	1	0	5	5	4	6	6
2	18	1	6	6	6	5	3	6	13	9	1	1	0	5	4	3	6	6
1	19	2	4	5	5	5	3	9	9	9	1	1	0	4	5	5	5	5
1	20	1	4	4	4	5	4	12	12	10	1	1	0	3	3	5	5	5
1	21	2	5	5	6	5	4	10	13	11	1	1	0	5	4	5	6	5
2	20	1	6	5	5	5	5	12	13	11	1	1	0	5	5	5	5	5
5	18	1	6	6	6	5	5	13	15	12	1	1	0	6	6	5	6	6
6	19	2	4	5	5	5	5	12	11	10	1	1	0	5	4	6	3	4
2	19	1	6	6	6	6	5	14	15	12	1	1	0	5	5	4	6	5
1	22	1	6	6	6	6	6	12	12	12	1	1	0	5	5	5	5	5
2	18	2	6	6	6	6	4	12	13	8	1	1	0	5	5	5	5	5
2	18	1	5	6	7	7	7	15	15	11	1	1	0	5	5	6	6	6
2	18	1	5	5	5	2	1	8	15	9	0	1	0	3	4	2	5	5
3	20	2	4	4	4	3	2	11	15	12	0	1	0	5	4	4	5	4
5	19	1	4	4	4	4	6	9	10	10	0	1	0	6	6	6	6	6
2	18	2	5	5	5	5	6	10	12	10	0	1	0	4	4	3	2	5
1	20	2	5	5	5	5	3	12	12	10	0	1	0	2	2	4	5	2
2	18	1	6	6	5	5	2	14	15	13	0	1	0	5	5	4	4	5
1	21	1	6	5	6	5	4	10	12	10	0	1	0	5	5	5	5	5
2	20	2	6	6	5	5	6	13	15	13	0	1	0	6	5	5	6	6
2	18	1	5	3	4	5	3	8	13	8	0	1	0	6	5	6	6	6
1	20	2	6	6	6	6	6	13	15	12	0	1	0	5	6	6	6	6
2	18	1	7	7	7	7	7	10	12	11	0	1	0	6	6	4	6	6
6	19	2	4	3	4	5	3	10	9	8	3	0	0	2	5	4	4	5
2	20	1	5	6	6	5	1	15	15	15	3	0	0	5	5	5	6	6
5	20	2	4	4	4	5	1	9	9	8	2	0	0	6	4	4	4	4
2	20	1	7	7	7	7	6	15	15	14	2	0	0	5	5	2	6	6
2	18	1	7	7	7	7	7	9	15	11	2	0	0	5	5	3	6	6
1	20	1	7	7	7	7	7	14	15	11	2	0	0	6	6	6	6	6
2	18	2	5	4	4	3	4	9	9	9	1	0	0	5	3	5	4	4
5	19	2	4	4	4	4	4	9	15	10	1	0	0	4	4	4	6	6
2	19	1	5	6	6	4	5	12	14	14	1	0	0	5	5	6	6	6
5	18	2	6	6	6	5	5	12	12	12	1	0	0	5	5	4	5	5
2	17	1	6	6	6	5	5	12	15	11	1	0	0	5	5	5	6	5
2	19	1	6	6	6	5	2	11	13	10	1	0	0	5	5	5	4	4
2	18	1	5	5	5	5	5	11	12	11	1	0	0	4	4	6	6	6
2	17	1	5	5	5	7	7	10	15	12	1	0	0	5	5	4	6	5
2	17	1	7	7	7	7	7	15	15	10	1	0	0	6	5	5	6	6
5	19	2	3	4	3	3	1	7	11	8	0	0	0	6	6	6	6	6
2	20	1	5	4	5	4	3	8	14	9	0	0	0	2	2	2	4	4
6	19	1	6	4	4	4	5	11	14	11	0	0	0	5	5	3	4	4
2	19	2	4	4	4	4	4	10	11	9	0	0	0	5	5	4	5	5
2	19	1	5	5	5	4	4	9	12	9	0	0	0	5	5	4	4	4
6	20	2	4	4	4	4	4	9	9	9	0	0	0	4	4	4	4	4
1	22	1	4	4	4	4	4	10	13	9	0	0	0	3	4	5	5	5
1	20	2	4	4	4	4	4	9	9	9	0	0	0	6	6	5	6	5
4	19	1	4	4	4	4	4	9	9	9	0	0	0	6	6	6	6	6
2	18	1	6	6	6	5	4	8	14	7	0	0	0	3	3	3	3	3
2	18	1	5	6	5	5	3	8	15	12	0	0	0	6	6	3	5	4
2	18	1	7	7	7	5	1	15	15	13	0	0	0	1	5	4	4	4
1	22	1	6	6	6	5	5	11	14	13	0	0	0	6	5	5	6	6
1	21	1	6	6	6	5	6	12	12	11	0	0	0	6	6	5	6	6
4	21	1	6	6	5	5	5	13	12	10	0	0	0	4	5	5	5	5
4	22	2	6	6	6	5	4	14	15	13	0	0	0	5	6	5	6	6
1	20	2	6	6	6	5	5	8	8	8	0	0	0	5	5	6	4	4
5	18	2	5	4	5	5	4	13	13	12	0	0	0	5	5	6	5	5
6	17	2	5	5	5	5	6	12	12	12	0	0	0	6	6	6	6	6
2	18	1	6	5	4	5	1	13	14	12	0	0	0	6	6	6	6	6
4	21	1	6	6	5	6	6	12	12	13	0	0	0	2	2	2	2	2
2	19	1	5	5	5	6	6	8	10	10	0	0	0	4	4	3	5	3
1	21	1	6	6	6	6	6	12	12	12	0	0	0	5	5	5	5	5
1	21	1	6	6	6	6	6	9	13	9	0	0	0	5	5	5	5	5
1	20	1	5	6	6	6	5	10	13	9	0	0	0	5	5	5	5	6
2	19	1	7	7	7	6	4	14	15	13	0	0	0	5	5	5	4	4
1	21	1	7	7	7	7	7	15	15	15	0	0	0	5	5	5	5	5
2	18	2	6	7	6	7	5	11	12	12	0	0	0	6	6	5	5	6
6	17	2	7	7	7	7	7	14	15	15	0	0	0	6	6	5	6	6
2	19	1	6	7	7	7	7	15	15	15	0	0	0	6	6	6	6	6
2	18	1	7	6	7	7	7	15	15	15	0	0	0	6	6	6	6	6
5	19	2	7	7	7	7	7	15	15	15	0	0	0	6	6	6	6	6

## Sheet: Des
University	Gender
1 = University in Chongqing	1 = male
2 = University in Nanjing	2 = female
3 = University in Nanjing
4 = University in Xi'an
5 = University in Chongqing
6 = University in Nanjing
